# Supplementary material
Source: publisher figshare collection journal article supplement (https://sage.figshare.com/ndownloader/files/14617229)
Supplement: Supplementary file 1 [file 14617229]

Brief Assessment Scale for Caregivers (BASC) - English version

**Please indicate to what extent you have had any of the following feelings in the past month because of taking care of \_\_\_\_\_ (name of care recipient).**

| <b>Because of (name of CR)'s illness, how much have you:</b>                                     | Not at all | A little | Some | A lot |
|--------------------------------------------------------------------------------------------------|------------|----------|------|-------|
| 1. Worried about (name of CR) even when you are not with him/her .....                           | 0          | 1        | 2    | 3     |
| 2. Been depressed because of (name of CR)'s illness ....                                         | 0          | 1        | 2    | 3     |
| 3. Been upset about not having enough time for yourself because of caring for (name of CR) ..... | 0          | 1        | 2    | 3     |
| 4. Been overwhelmed by the responsibility of caring for (name of CR) .....                       | 0          | 1        | 2    | 3     |

| <b>Please rate your distress during this past month:</b>                                                                                          | Not at all | A little | Some | A lot of | N/A |
|---------------------------------------------------------------------------------------------------------------------------------------------------|------------|----------|------|----------|-----|
| 5. Distress over seeing (name of CR) in so much pain or discomfort .....                                                                          | 0          | 1        | 2    | 3        | 4   |
| 6. Distress at not having enough time to do your job, other responsibilities and chores .....                                                     | 0          | 1        | 2    | 3        | 4   |
| 7. Distress about making decisions about hospitalizing (name of CR) .....                                                                         | 0          | 1        | 2    | 3        | 4   |
| 8. Distress over talking about what medical procedures (name of CR) would want or would not want if his/her heart or breathing were to stop ..... | 0          | 1        | 2    | 3        | 4   |
| 9. Distress of seeing how much (name of CR)'s illness has changed your relationship .....                                                         | 0          | 1        | 2    | 3        | 4   |
| 10. Distress at having strained relationships with other family members over taking care of (name of CR) .....                                    | 0          | 1        | 2    | 3        | 4   |

| <b>Please rate whether you agree or disagree with each of these statements as it applies to you in your care of (name of CR) this past month:</b> | Agree a lot | Agree a little | Disagree a little | Disagree a lot | N/A |
|---------------------------------------------------------------------------------------------------------------------------------------------------|-------------|----------------|-------------------|----------------|-----|
| 11. Taking care of (name of CR) has drawn the two of us closer together .....                                                                     | 0           | 1              | 2                 | 3              | 4   |
| 12. Taking care of (name of CR) has brought meaning to my life .                                                                                  | 0           | 1              | 2                 | 3              | 4   |
| 13. Taking care of (name of CR) has drawn other members of our family closer together .....                                                       | 0           | 1              | 2                 | 3              | 4   |
| 14. Taking care of (name of CR) makes me feel good about myself                                                                                   | 0           | 1              | 2                 | 3              | 4   |
